# Supplementary material
Source: PubMed Central journal article supplement (PMC7152927)
Supplement: NIHMS1569049-supplement-1.pdf [file NIHMS1569049-supplement-1.pdf]

Figure S1

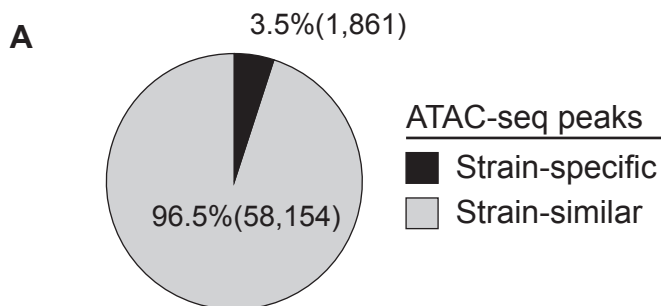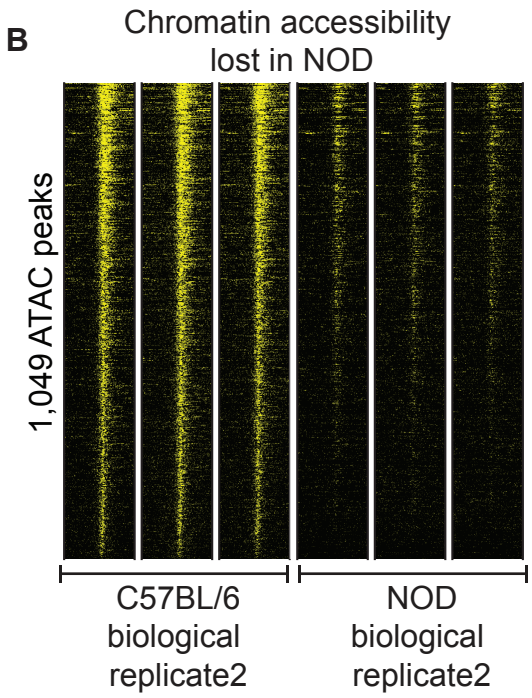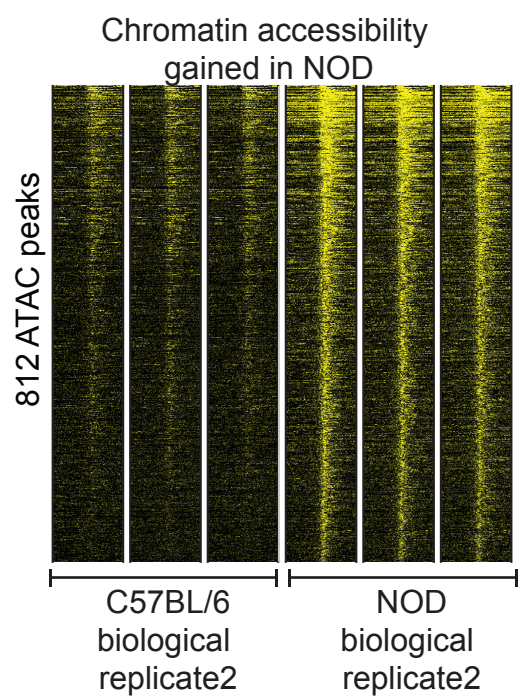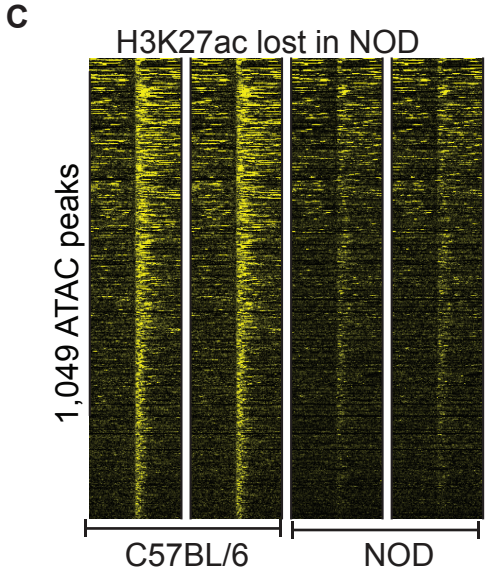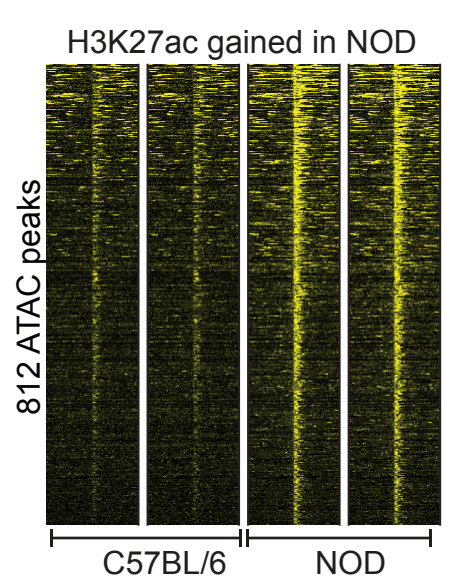

**D** Lost in NOD

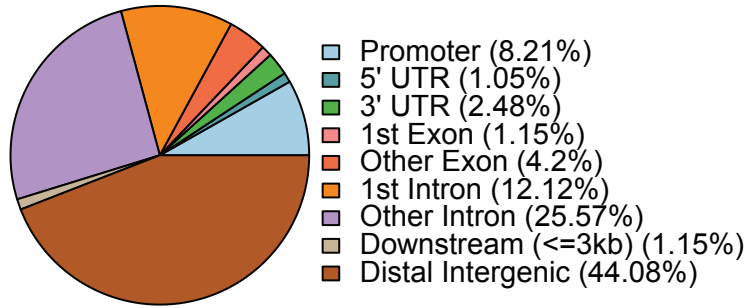

Gained in NOD

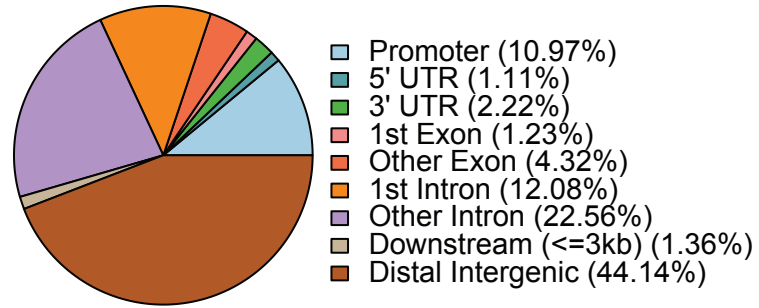

**Supplementary Figure 1. Genomic features of strain-specific open chromatin regions (related to Figure 1).**

**(A)** Pie chart depicts the percentage of strain-specific regulatory elements measured by ATAC-seq. Three technical and two biological replicates were generated for each strain. Together, we identified 60,015 open chromatin regions in T cells, with 96% of them (58,154) demonstrating similar levels of accessibility between the two genetically distinct animals (Figure S1A). Using  $\log_2\text{FoldChange} > 1$  and  $p_{adj} < 1e-4$  threshold, we found 1,049 accessible chromatin regions that were unique to T cells of C57BL/6 mice (referred to as 'lost in NOD') while 812 regulatory regions were unique to T cells of NOD mice (referred to as 'gained in NOD')

**(B)** Strain-specific ATAC-seq peaks are reproduced in biological replicates.

**(C)** Strain-specific ATAC-seq peaks overlap with strain-specific H3K27ac.

**(D)** The strain-specific regulatory elements were enriched at noncoding genomic regions. Promoters were defined as +/-1000bp of transcriptional start sites (TSS).

**Figure S2**

**A**

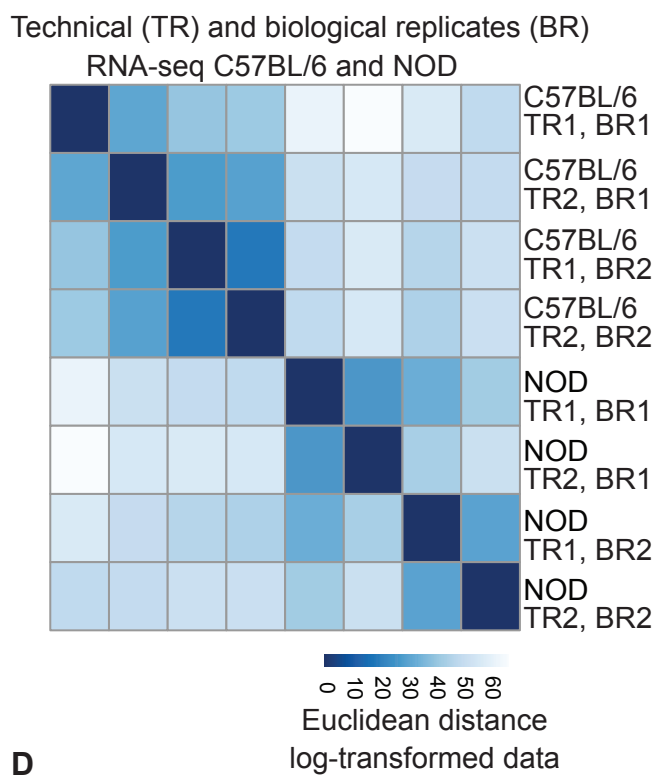

**B**

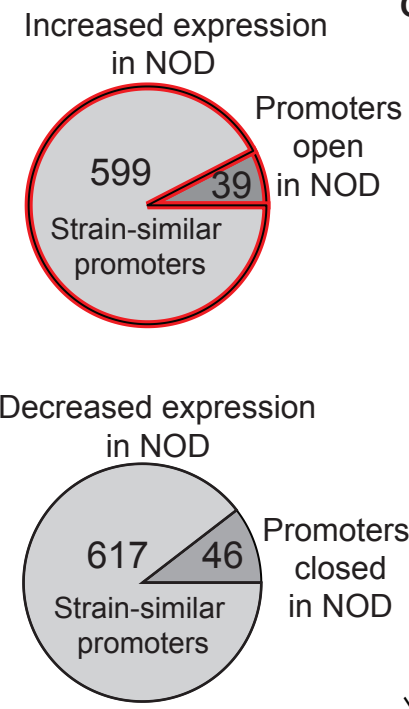

**C**

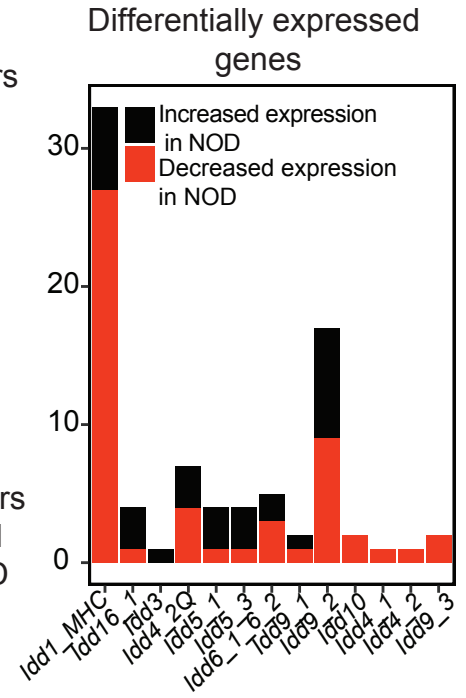

**D**

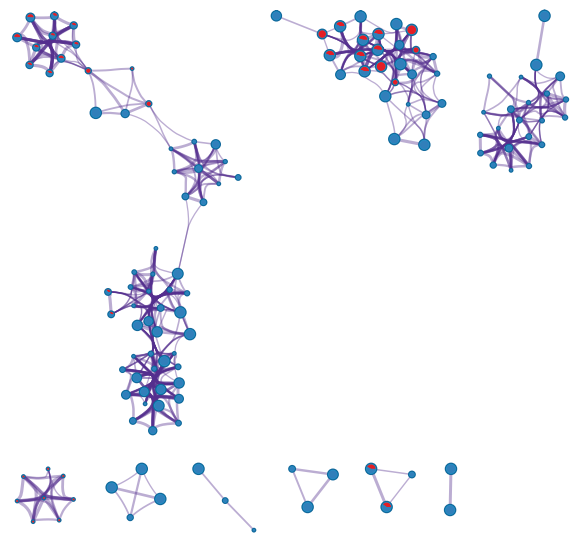

**E**

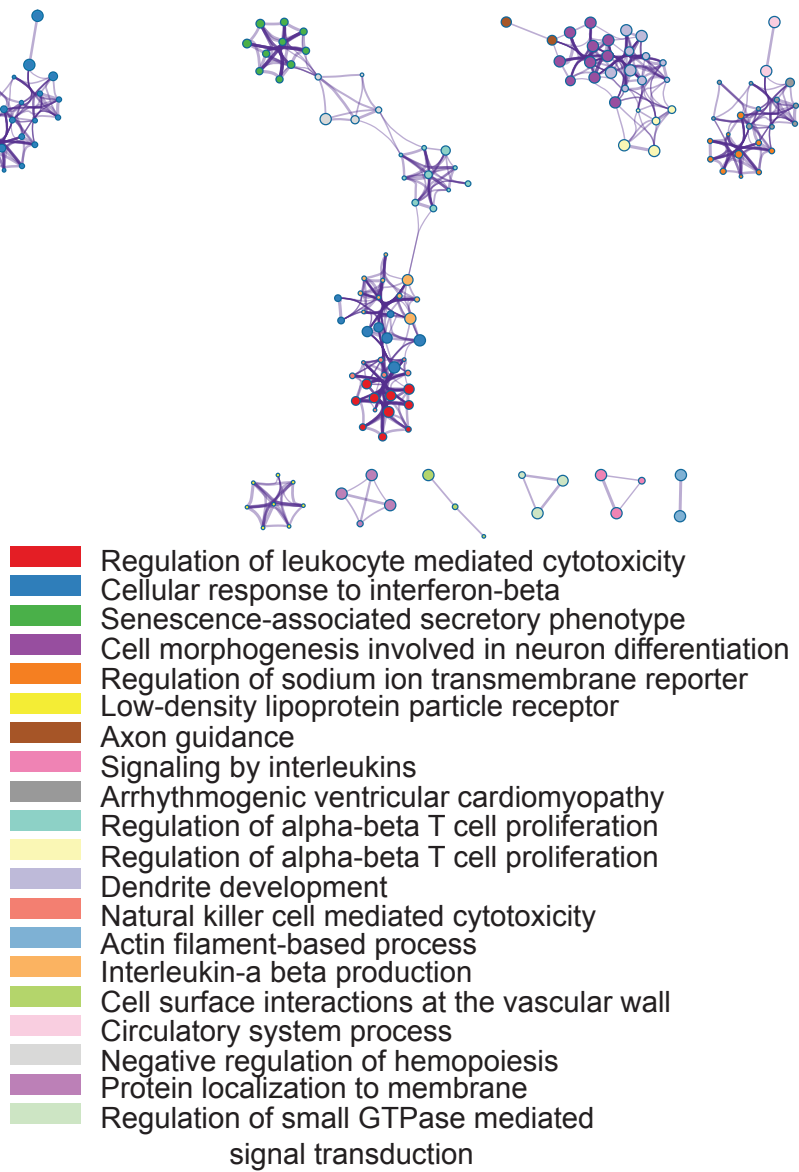

**Supplementary Figure 2. Increased expression of genes in T lymphocytes of NOD mice are associated with type 1 diabetes (related to Figure 2).**

**(A)** Heatmap depicts euclidean distance for log transformed count data between technical and biological replicates for RNA-seq experiments in DP T cells of C57BL/6 and NOD mice.

**(B)** Pie charts depict differentially expressed genes with differentially accessible promoters between strains. Promoters are defined as +/-1000bp TSS.

**(C)** Barplot demonstrates the number of strain-specific genes within each *ldd* interval.

**(D-E)** Gene ontology analysis for differentially expressed genes using *metascape* suggests the 'regulation of leukocyte mediated cytotoxicity' associated genes to be enriched at genes with increased expression in NOD. While genes within each ontology is depicted as connected nodes in **(E)**, the same genes increased or decreased expression in NOD are shown in **(D)**.

**Figure S3**

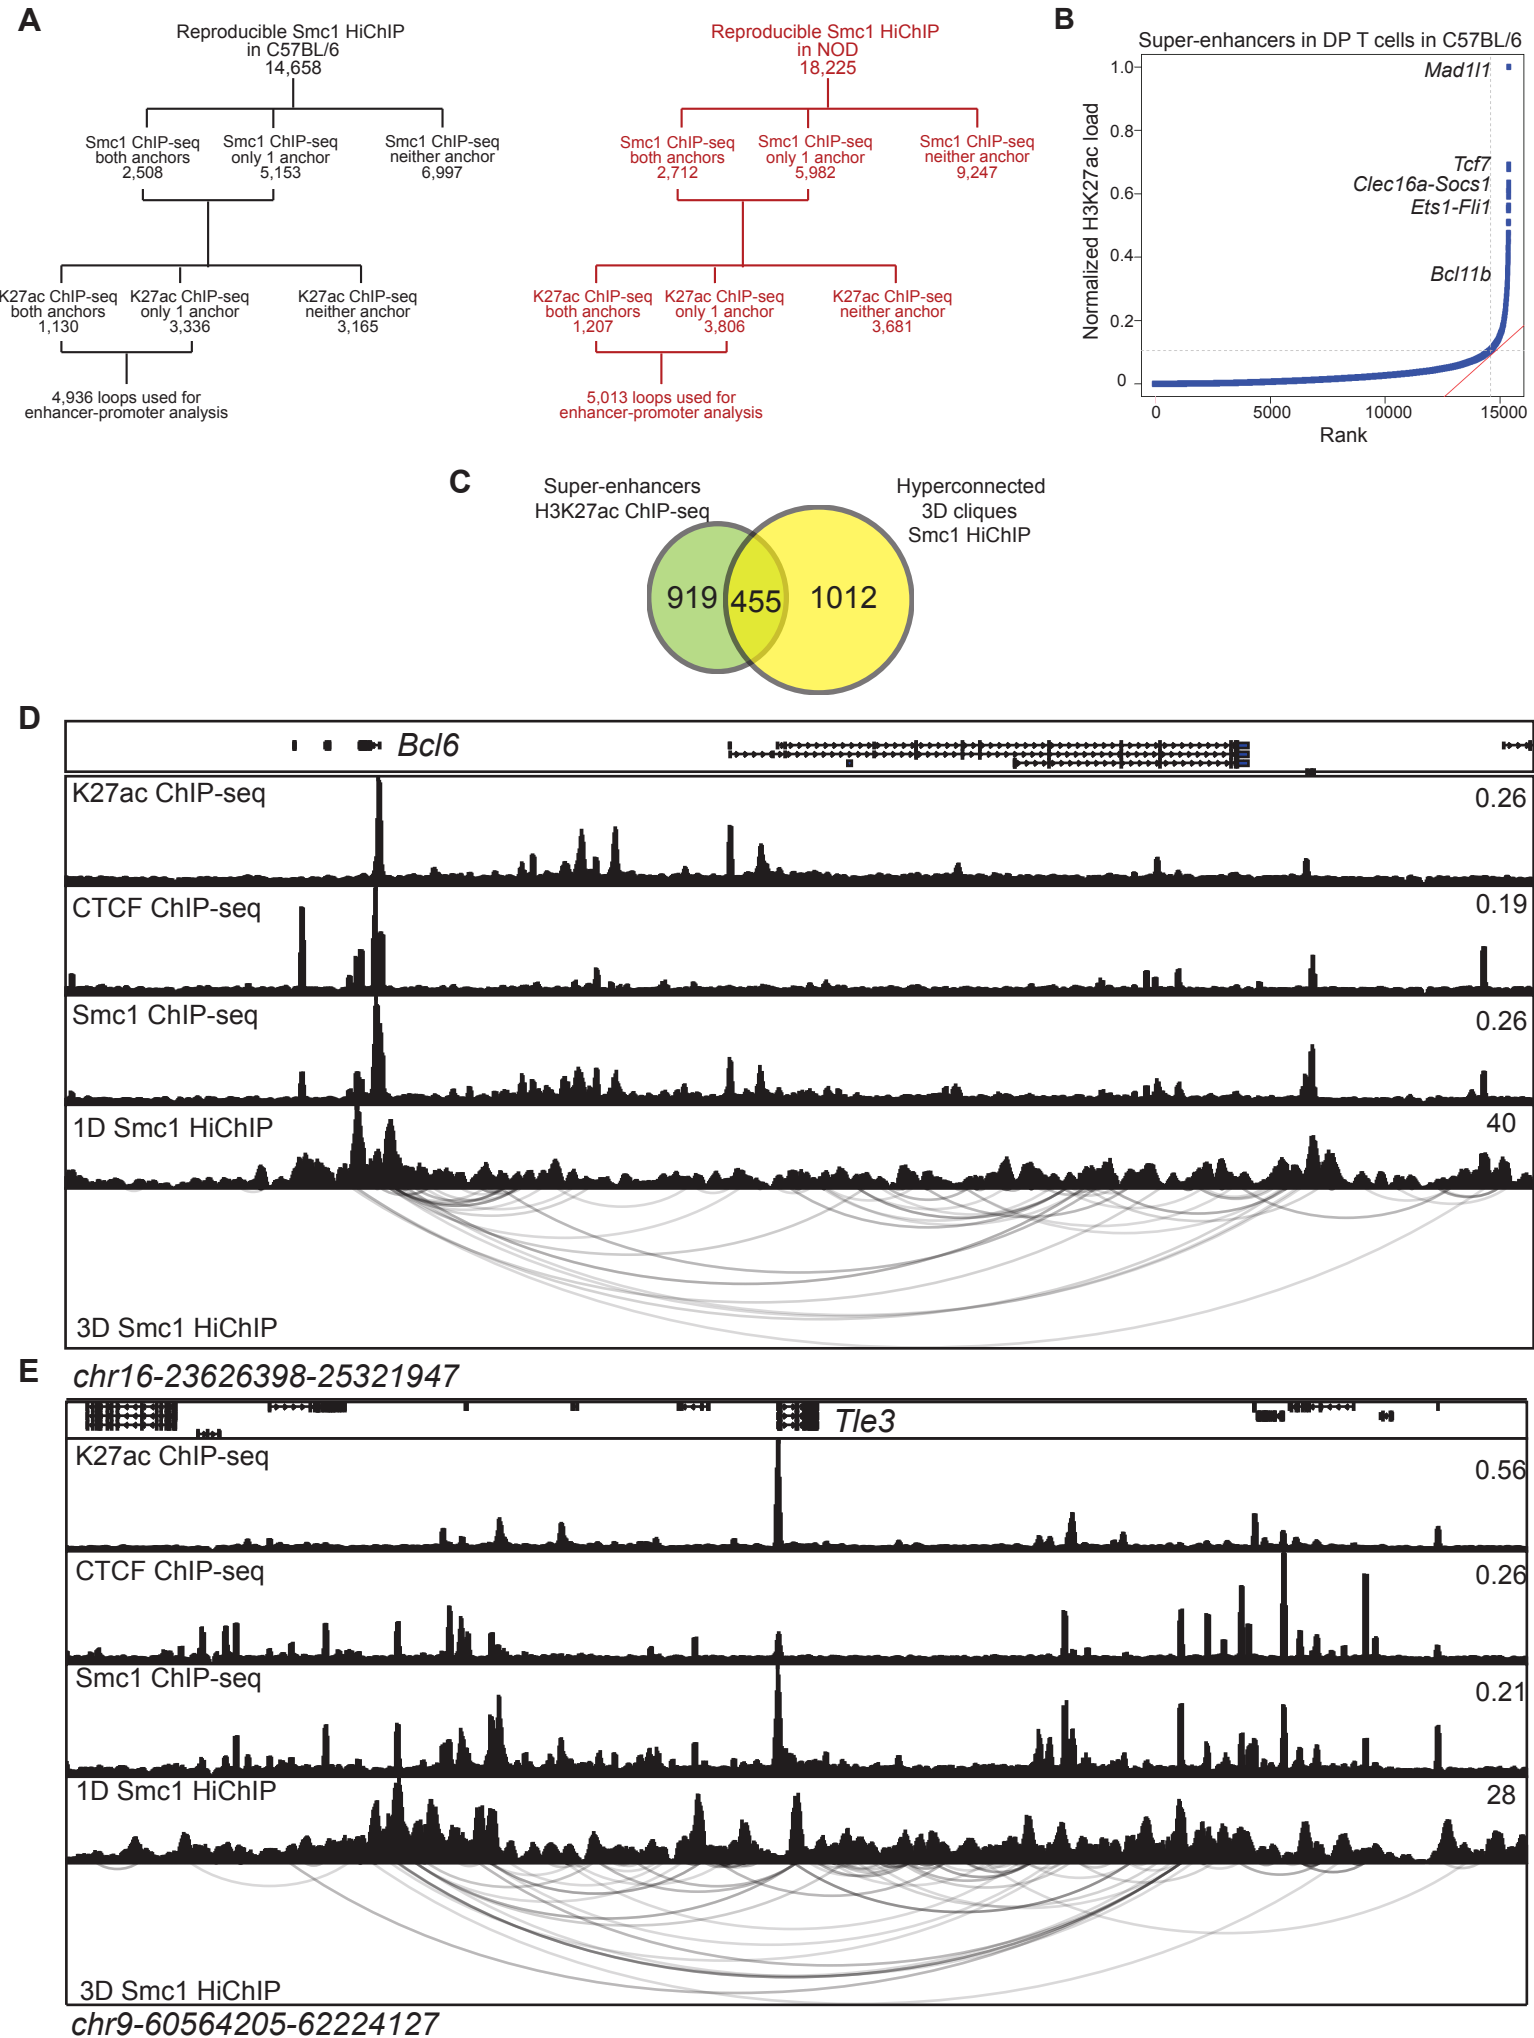

**Supplementary Figure 3. Genes with prominent roles in T cell development are enriched at hyperconnected 3D cliques of C57BL/6 (related to Figures 3 and 4).**

(A) We performed Smc1 HiChIP in replicates with ~500 million sequencing reads for each sample. Only significant loops that were detected in both replicates of a sample with an  $FDR \leq 0.05$  were retained for further analysis (14,658 reproducible loops in C57BL/6 and 18,225 reproducible loops in NOD). Furthermore, only reproducible Smc1-mediated loops with Smc1 ChIP-seq peaks deposited at least at one anchor were considered for further analysis providing 7,661 interactions (52%) in C57BL/6 and 8,694 significant interactions (47%) in NOD. Significant loops were further filtered with signals from H3K27ac ChIP-seq (4,936 in C57BL/6 and 5,013 in NOD mice).

(B) Super-enhancers defined by H3K27ac load in DP T cells of C57BL/6 mice.

(C) The Venn diagram demonstrates overlapping enhancers marked as super-enhancers with nodes of hyperconnected 3D cliques in C57BL/6.

(D-E) The genome-browser views of hyperconnected 3D cliques overlapping *Bcl6* and *Tle3* genes. HiChIP interactions are reproducible in two biological replicates.

**Figure S4**

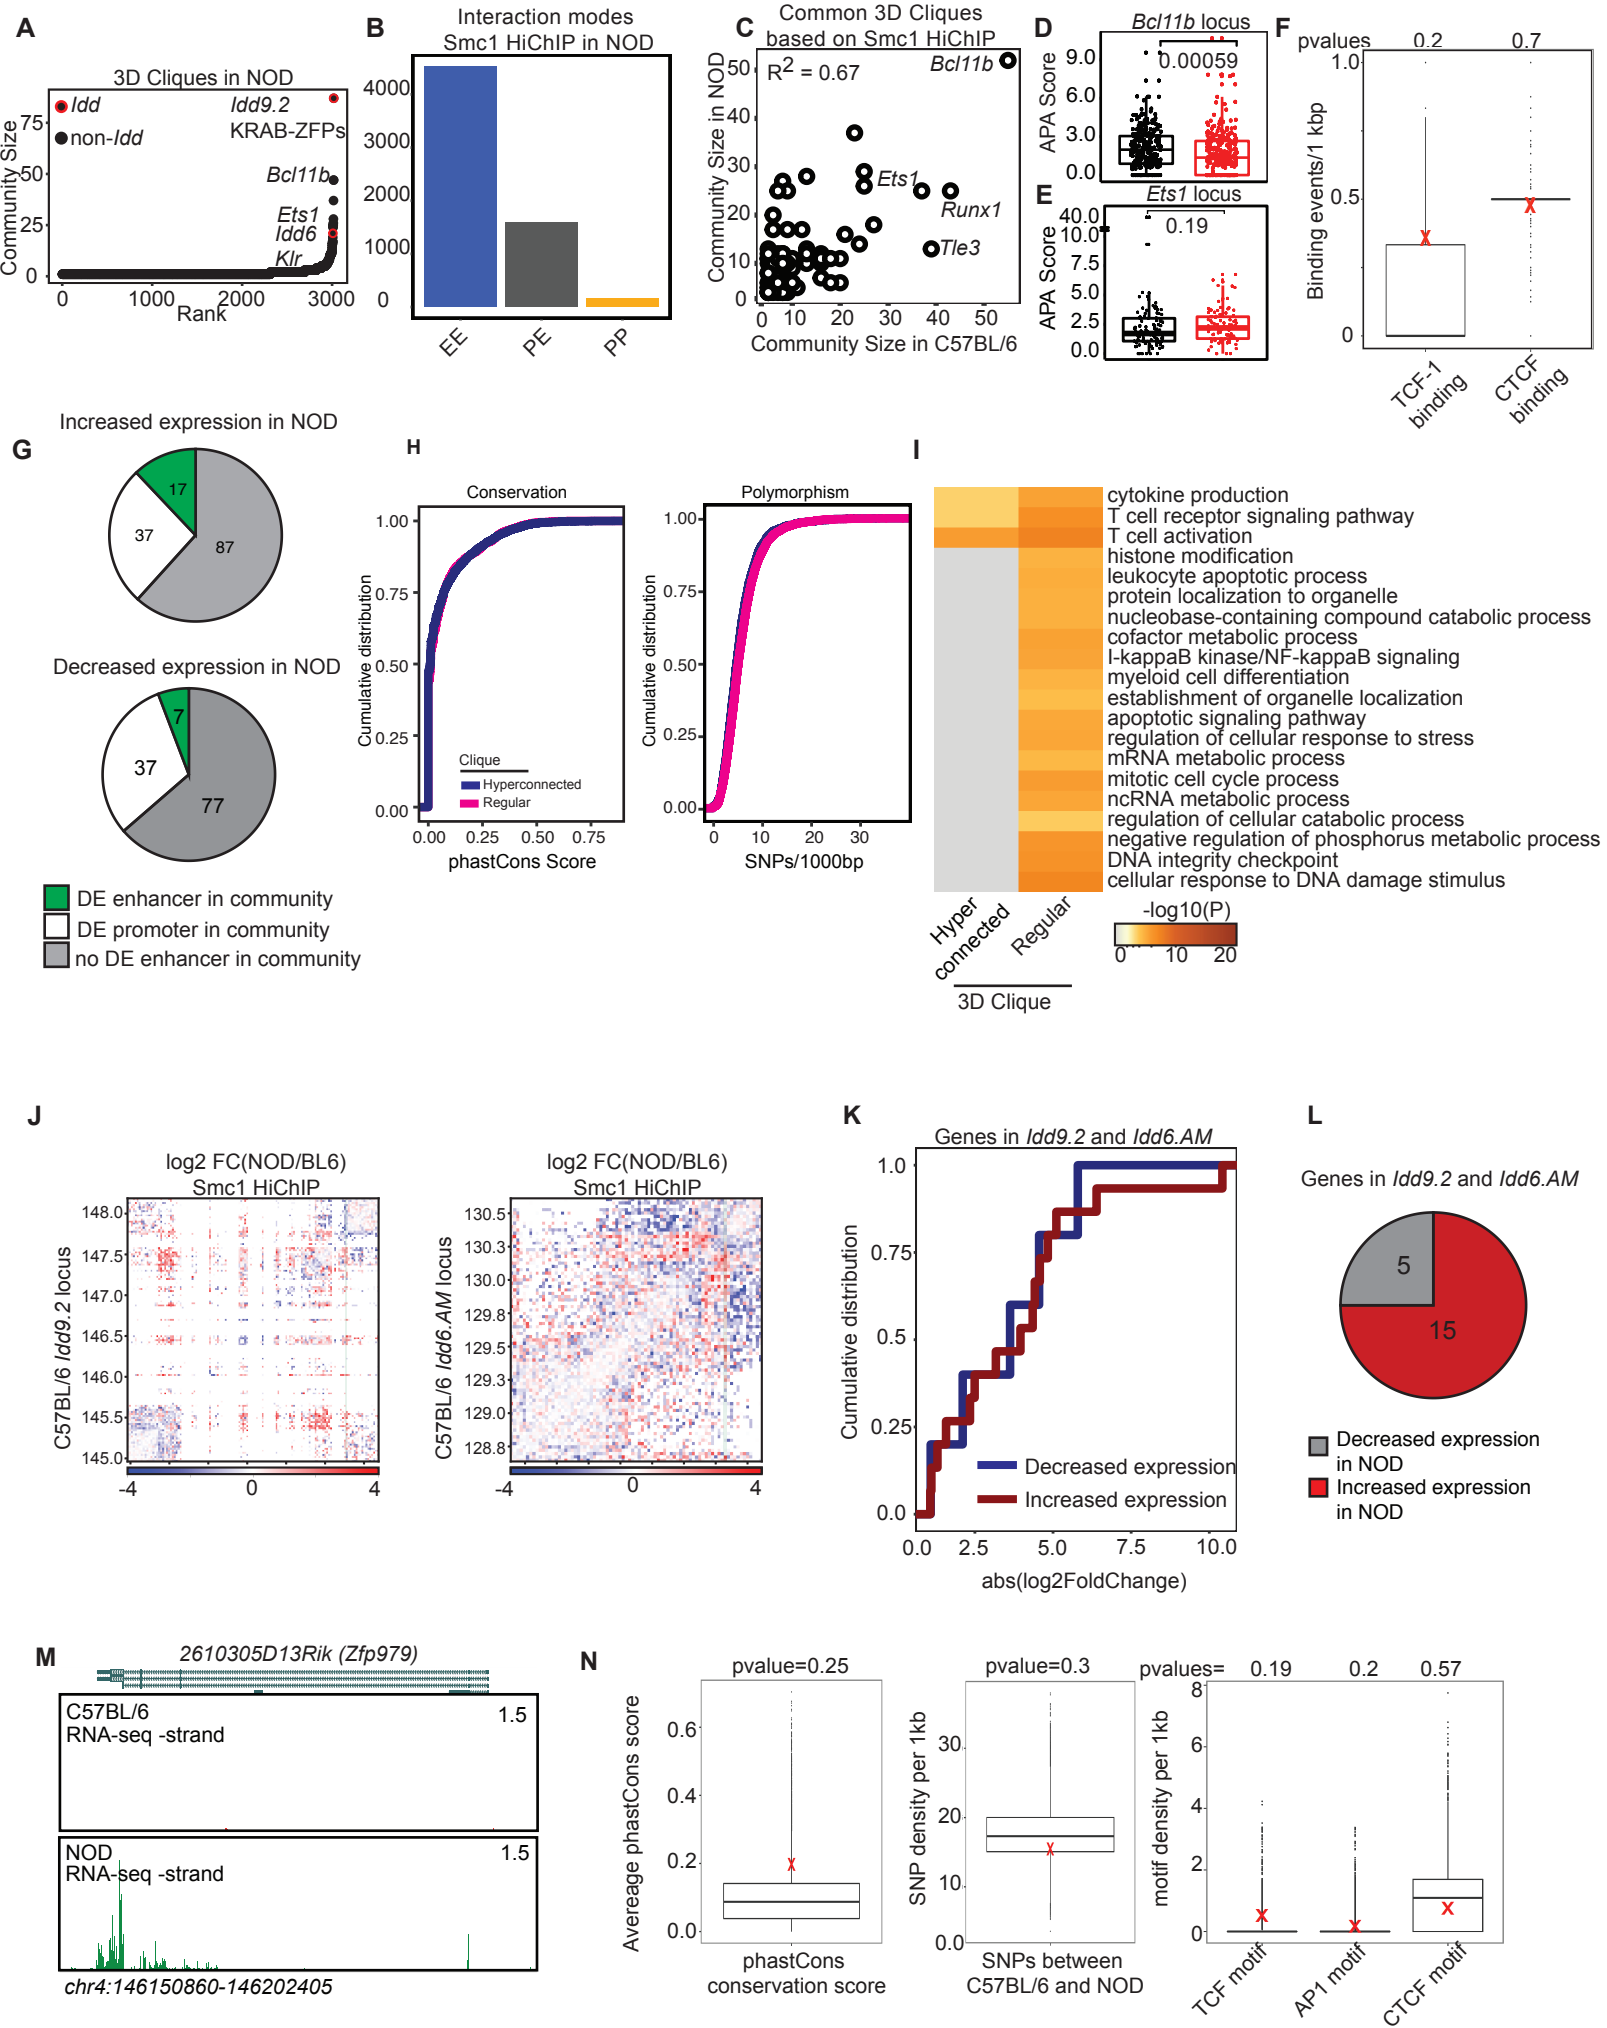

**Supplementary Figure 4. Shared and distinct hyperconnected 3D cliques (related to Figures 3-5).**

**(A)** Hyperconnected 3D cliques in DP T cells of NOD mice.

**(B)** The number of enhancer-enhancer (EE), enhancer-promoter (EP), and promoter-promoter (PP) interactions in double-positive thymocytes measured by H3K27ac HiChIP interactions reproduced in two biological replicates in NOD mice.

**(C)** Pearson correlation for the number of interactions in hyperconnected 3D cliques shared in the two strains. Genomic regions scored as hyperconnected in two strains were selected and the number of interactions for overlapping 3D cliques are shown in the dot plot.

**(D-E)** APA scores of significant loops in *Bcl11b* and *Ets1* suggest that while interactions at *Ets1* locus **(E)** are similar in both strains, T cells of C57BL/6 demonstrates slightly higher *Smc1*-mediated interactions at the *Bcl11b* locus **(D)**.

**(F)** Boxplot represents the distribution of TCF-1 and CTCF binding events in DP T cells measured by ChIP-seq at nodes of 1,000,000 permuted resilient 3D cliques. Red X represents the average binding events at nodes of 17 resilient hyperconnected 3D cliques.

**(G)** Pie chart depicts number of genes with increased expression in NOD overlapping HiChIP loop anchors with gain in enhancer or promoter elements in NOD compared with C57BL/6. “DE enhancer in community” demonstrates the presence of a differentially accessible enhancer in a 3D community containing the differentially expressed gene. Pie chart depicts number of genes with decreased expression in NOD overlapping HiChIP loop anchors with loss in enhancer or promoter elements in NOD compared with C57BL/6. “DE enhancer in community” demonstrates the presence of a differentially accessible enhancer in a 3D community containing the differentially expressed gene.

**(H)** Cumulative distribution function for phastCons score and SNPs at hyperconnected (blue) and regular (pink) 3D cliques in NOD.

**(I)** Gene ontology analysis using *metascape* suggests ‘cytokine production’, ‘TCR signaling pathway’, and ‘T cell activation’ to be associated with hyperconnected 3D cliques in NOD mice.

**(J)** LogFC in contact frequency matrix for *Smc1* HiChIP between two strains at *Idd* loci.

**(K)** Cumulative distribution depicts absolute log fold-change between two strains for genes in 3D cliques spanning *Idd9.2* and *Idd6.AM*.

**(L)** Pie chart demonstrates the number of differentially expressed genes in 3D cliques spanning *Idd9.2* and *Idd6.AM* domains.



**(M)** Genome-browser demonstrates negative strand coverage profile of RNA-seq data in C57BL/6 and NOD mice at *2610305D13Rik (Zfp979)* gene. All bigwig files are tag-per-million normalized. A representative of 4 RNA-seq experiments is shown.

**(N)** Boxplot represents the distribution of TCF, AP-1 and CTCF motif density per 1kbp at nodes of 100,000 permuted hyperconnected 3D cliques in NOD strain. Red X represents the average density of TCF, AP-1 and CTCF motif per 1kbp at nodes of resilient hyperconnected 3D cliques.

**Figure S5**

Islet-specific CD4<sup>+</sup> T cells  
*Idd9.2* genes

**A**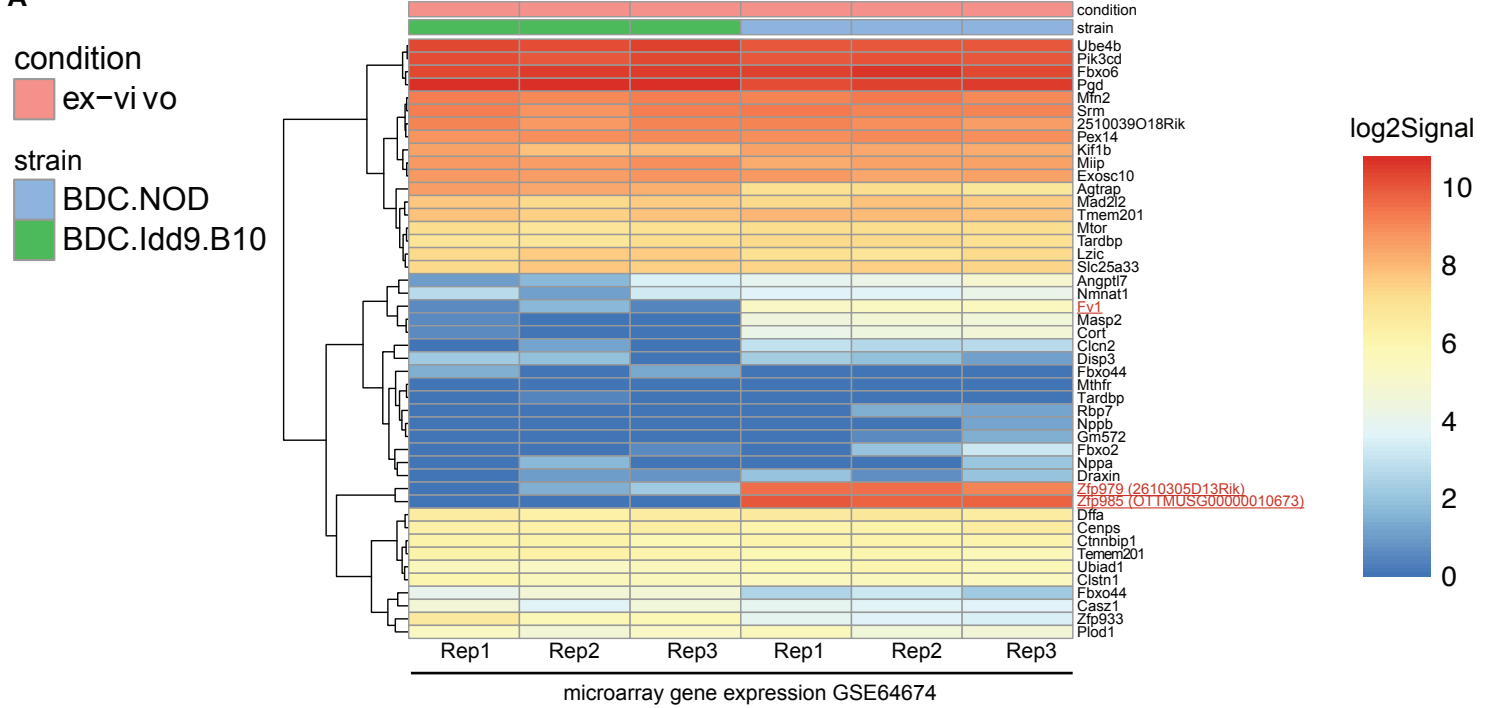**B**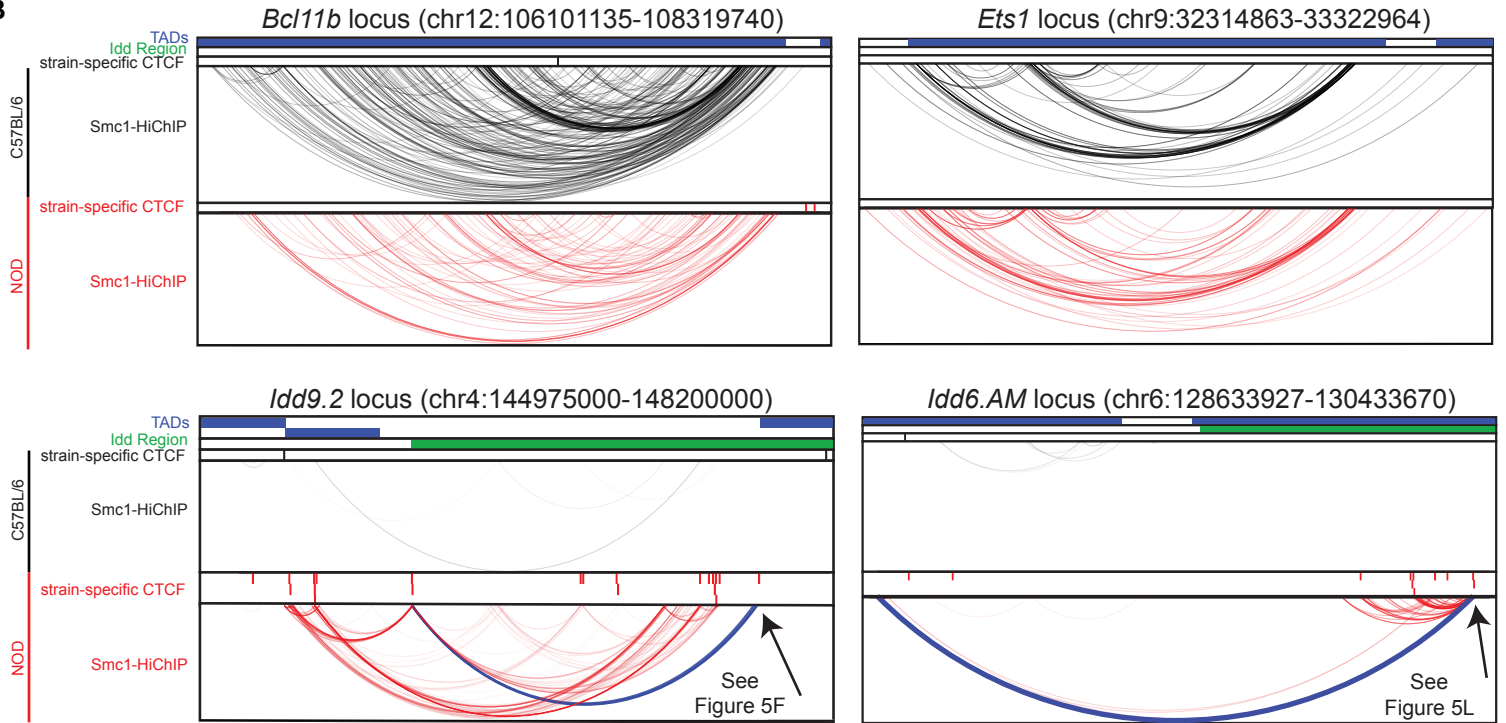**C**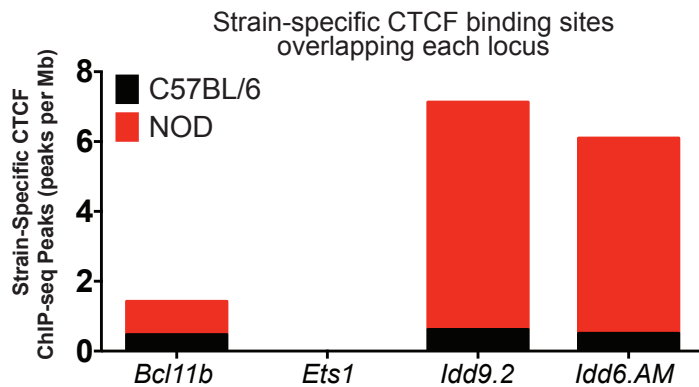**D**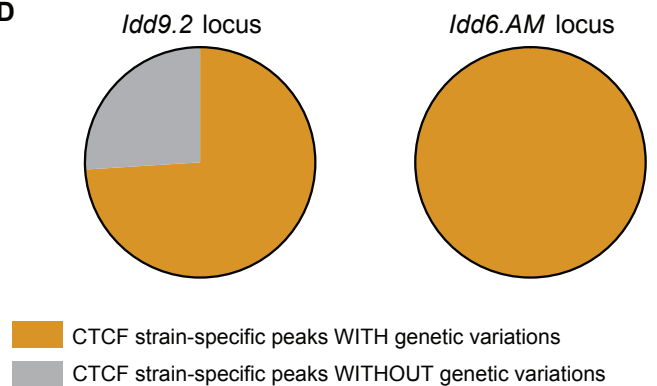

\* 100% of strain-specific CTCF sites have a CTCF binding motif

**Supplementary Figure 5. Investigation of gene expression and CTCF binding at the two *Idd* regions with hyperconnected 3D cliques (related to Figure 5).**

**(A)** Heatmap demonstrates expression levels of genes in the *Idd9.2* locus in CD4<sup>+</sup> T cells of NOD mice (noted as BDC.NOD) in comparison with those in diabetes-resistant congenic *Idd9.2* mice (noted as BDC.Idd9.B10) where both strains carry a transgenic TCR derived from a diabetogenic NOD T cell clone (BDC). As described in (Berry et al., 2015), ex vivo cells from the spleen were stained with anti-CD4 and anti-TCRVβ4, and subsequently sorted for CD4<sup>+</sup>TCRVβ4<sup>+</sup> (transgenic) T cells. Analyzing the publically available microarray data (Berry et al., 2015), we found the genes with increased expression in NOD (in red) within the *Idd* domain harboring the hyperconnected 3D clique, *Fv1*, *Zfp979* and *Zfp985*, in CD4<sup>+</sup> T cells of BDC.NOD mice compared to BDC.Idd9.B10 that are protected from diabetes. All genes in *Idd9.2* with comparable probe ids in the microarray are shown.

**(B)** Genome-browser views of the *Bcl11b*, *Ets1*, *Idd9.2*, and *Idd6.AM* loci with the demarcation of TADs (blue) (Dixon et al., 2012), *Idd* regions (green), C57BL/6 CTCF ChIP-seq peaks (black lines), C57BL/6 H3K27ac-HiChIP (black loops), NOD CTCF ChIP-seq peaks (red lines), and NOD H3K27ac-HiChIP (red loops). Yellow boxes highlight regions with increased CTCF binding events in the *Idd* regions.

**(C)** Bar graph of strain-specific CTCF binding sites that overlap each locus (peaks per 1Mb).

**(D)** Pie charts indicating the proportion of CTCF strain-specific peaks that overlap with genetic variations within the two *Idd* regions.

**Figure S6**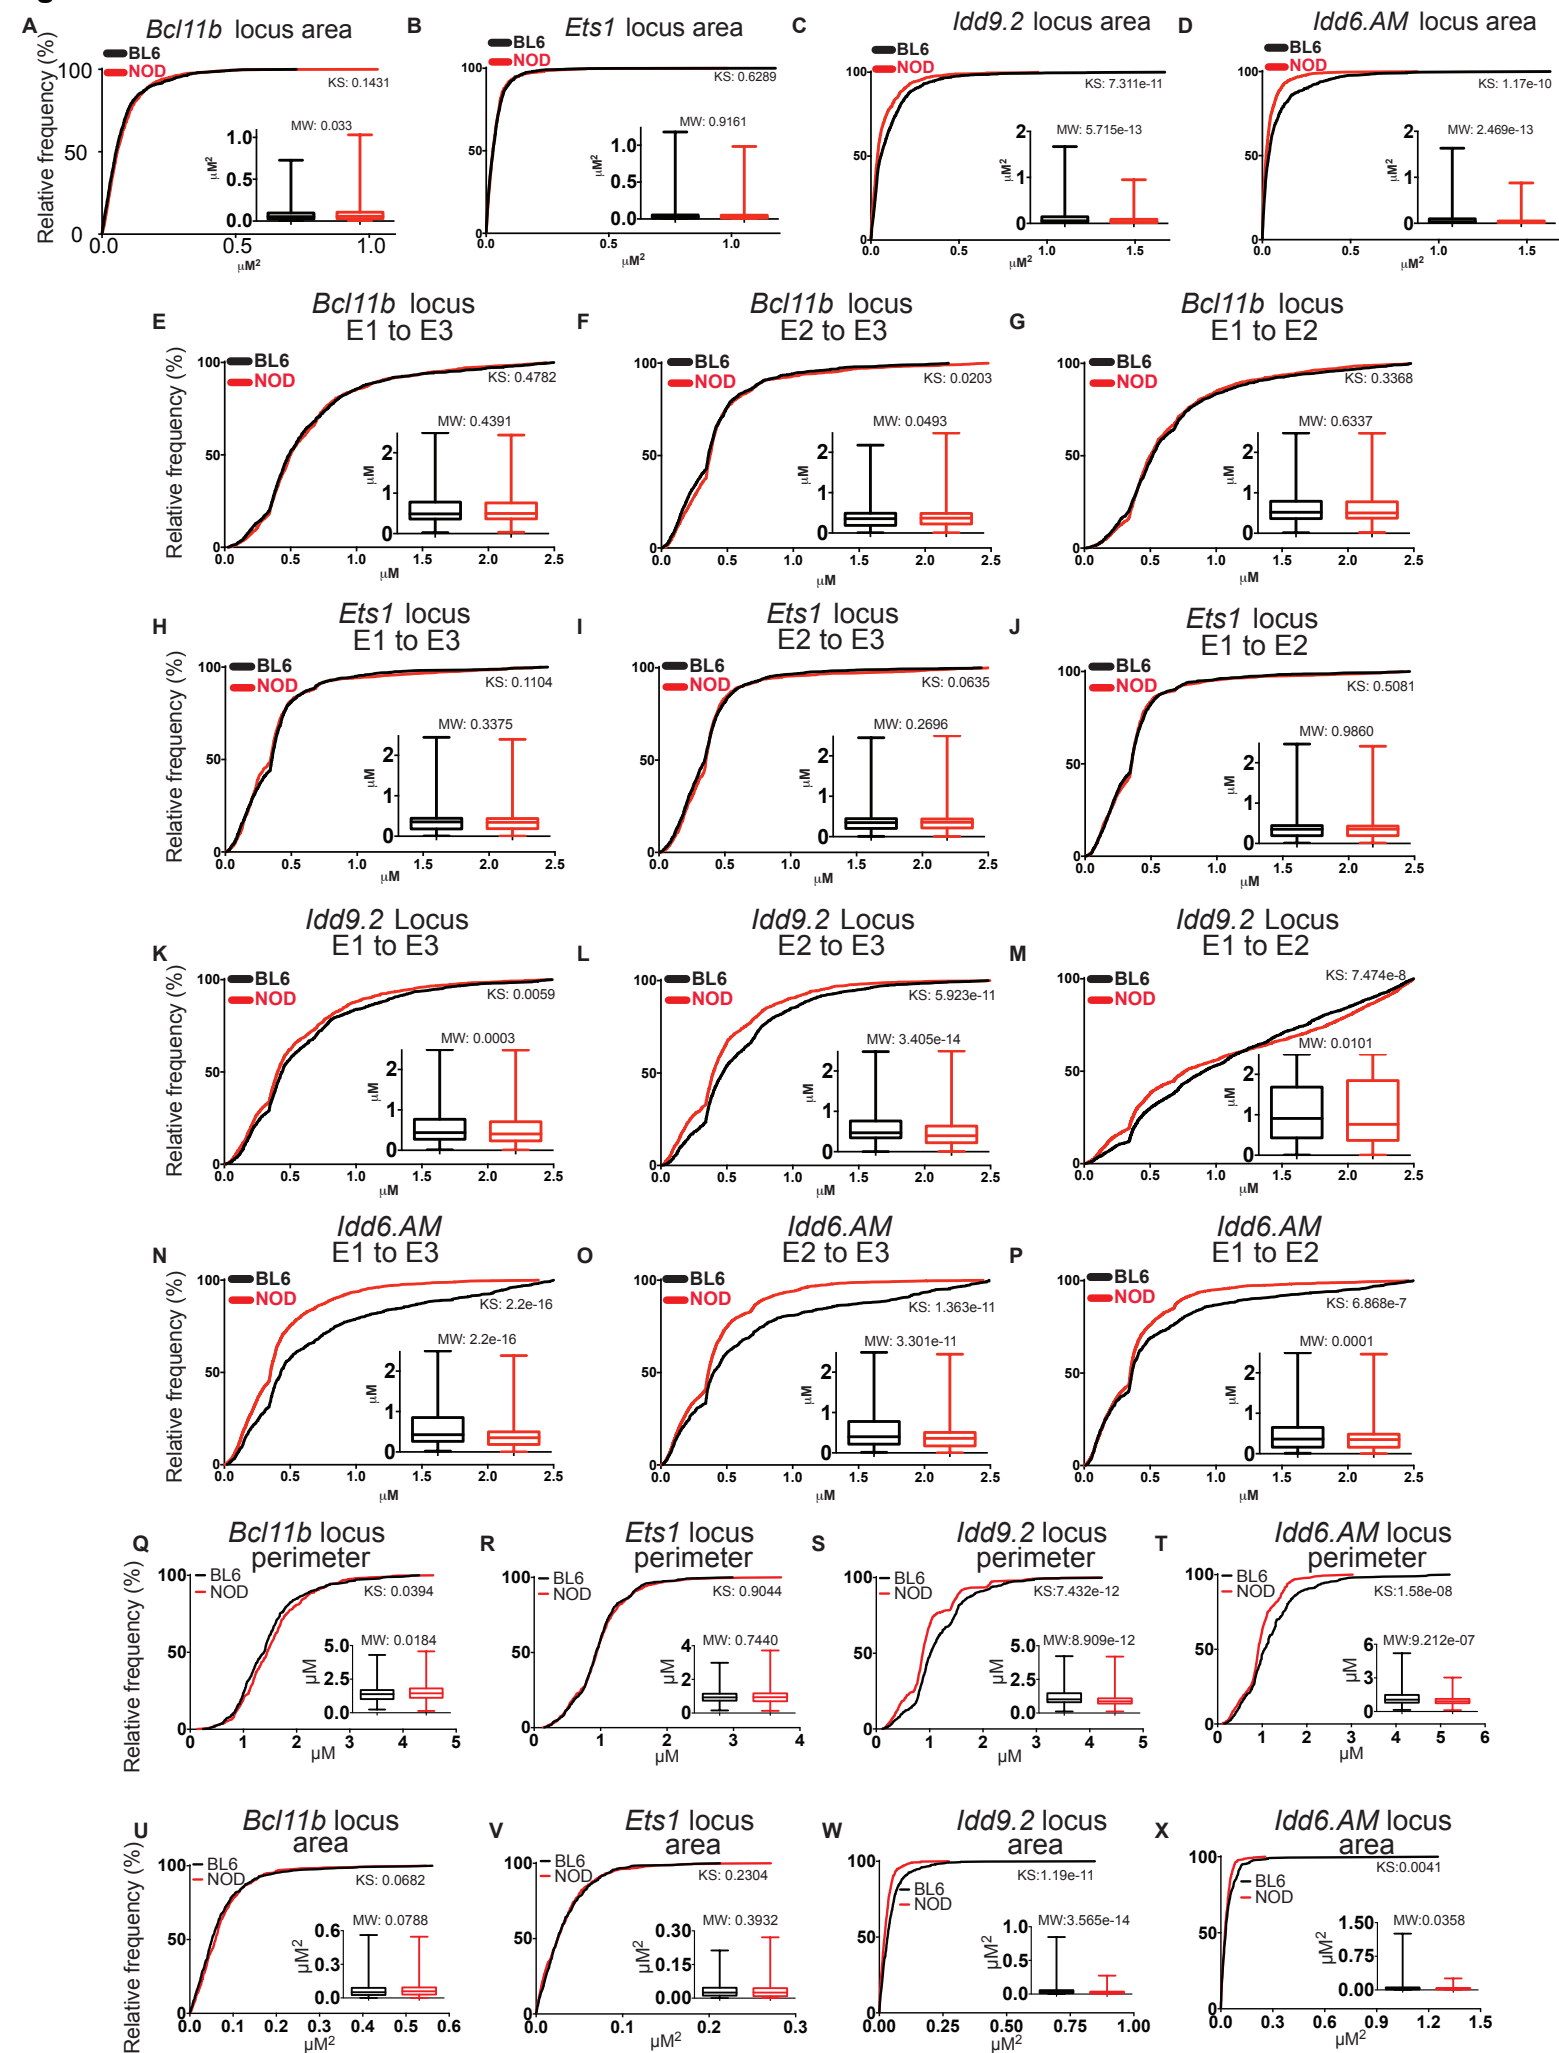

**Supplementary Figure 6. Oligopaint 3D FISH corroborates the formation of strain-similar and diabetes-specific hyperconnected 3D cliques (related to Figure 6).**

**(A-D)** Cumulative distribution plots and box plots of the spatial area formed by the three probes in ~500 cells (see Materials & Methods for exact numbers) per strain per locus (KS: Kolmogorov-Smirnov test & MW: Mann-Whitney test) at the *Bcl11b* locus, *Ets1* locus, *Idd9.2* locus, and *Idd6.AM* locus.

**(E-P)** Pairwise distances between probes in ~500 cells (see Materials & Methods for exact numbers) per strain per locus (KS: Kolmogorov-Smirnov test & MW: Mann-Whitney test) at the *Bcl11b* locus, *Ets1* locus, *Idd9.2* locus, and *Idd6.AM* locus.

**(Q-X)** Oligopaint 3D FISH in second biological replicate affirms the findings from the first Oligopaint replicate. **(Q-T)** Cumulative distribution plots and box plots of the spatial perimeter formed by the three probes in ~400 cells (see Materials & Methods for exact numbers) per strain per locus (KS: Kolmogorov-Smirnov test & MW: Mann-Whitney test) at the *Bcl11b* locus, *Ets1* locus, *Idd9.2* locus, and *Idd6.AM* locus. **(U-X)** Cumulative distribution plots and box plots of the spatial area formed by the three probes in ~400 cells (see Materials & Methods for exact numbers) per strain per locus (KS: Kolmogorov-Smirnov test & MW: Mann-Whitney test) at the *Bcl11b* locus, *Ets1* locus, *Idd9.2* locus, and *Idd6.AM* locus.

**Figure S7**log2 (NOD/F1)  
Smc1 HiChIPlog2 (F1/BL6)  
Smc1 HiChIPlog2 (NOD/BL6)  
Smc1 HiChIP**A**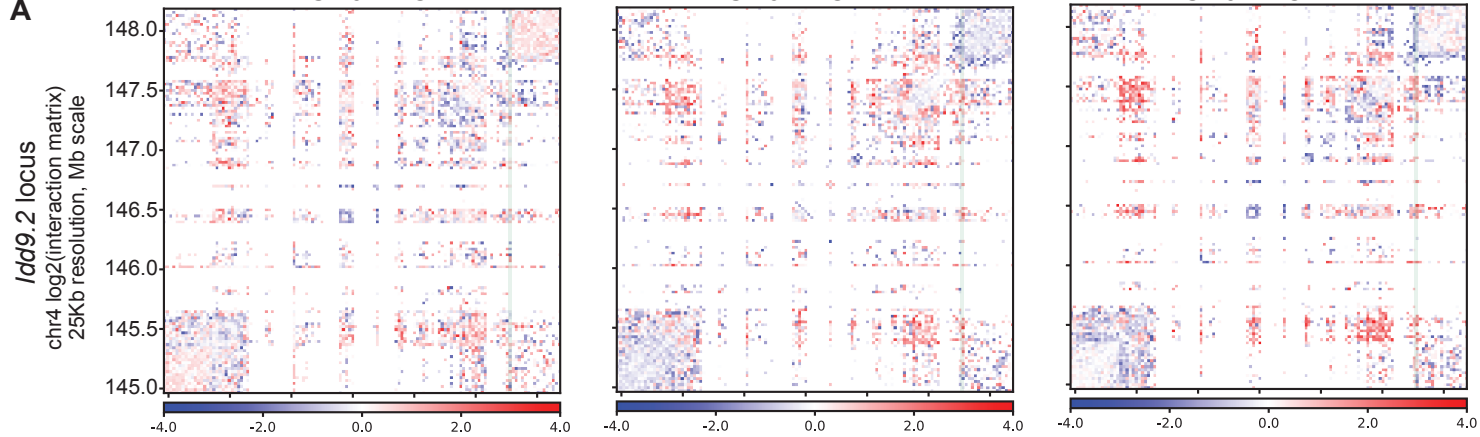**B**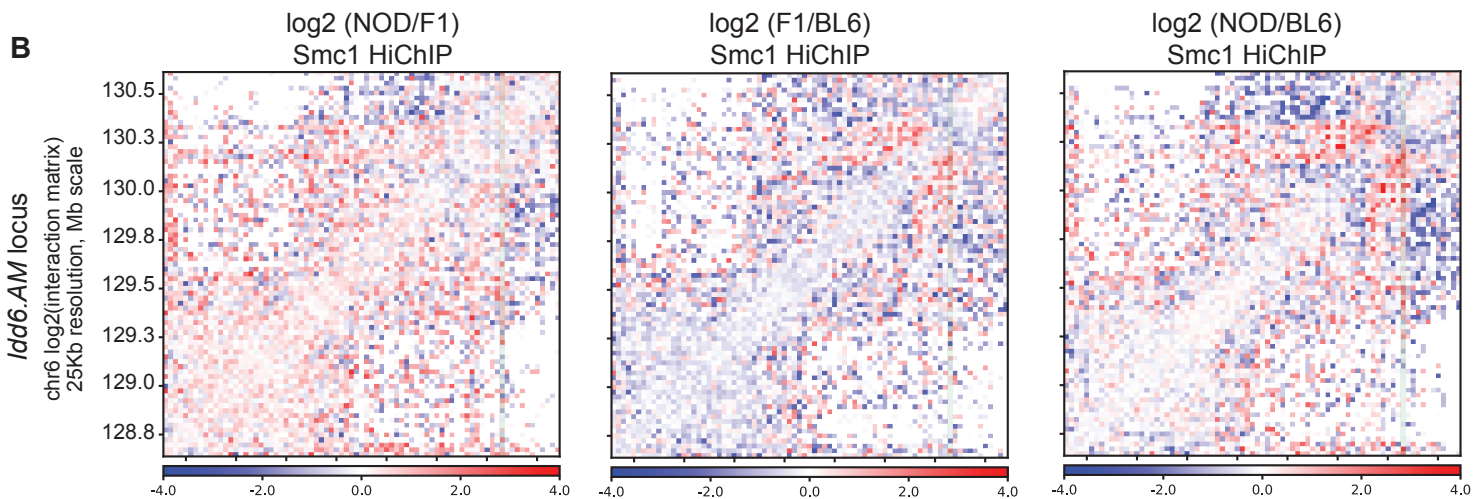**C**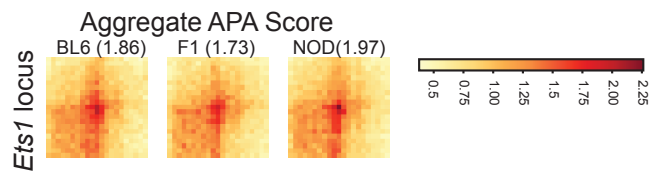**D**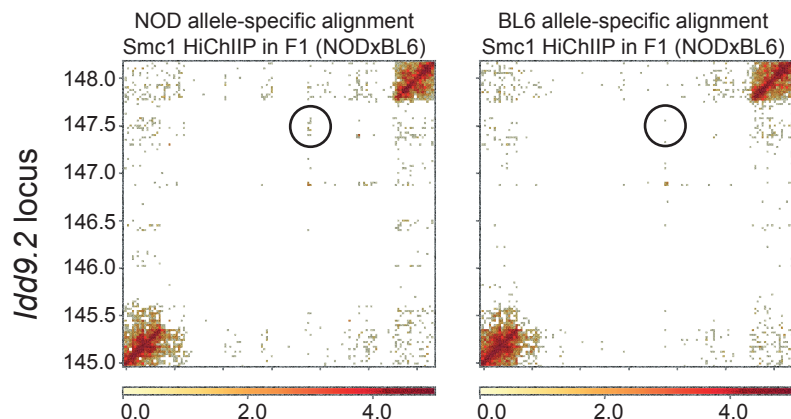**E**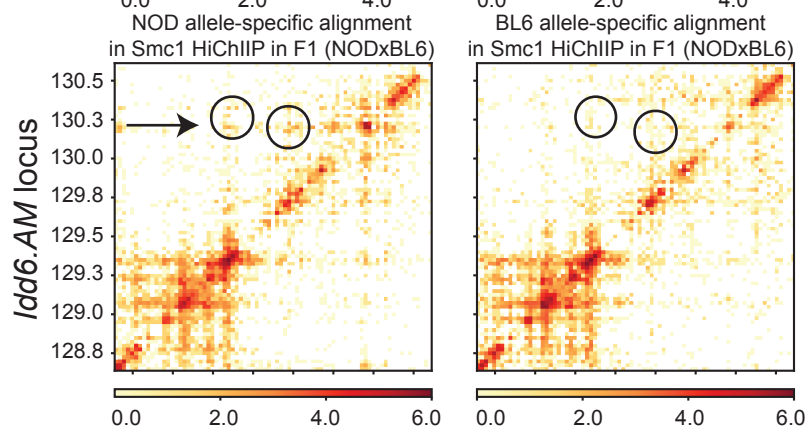**F**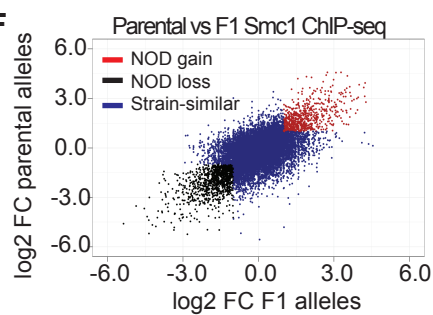**G**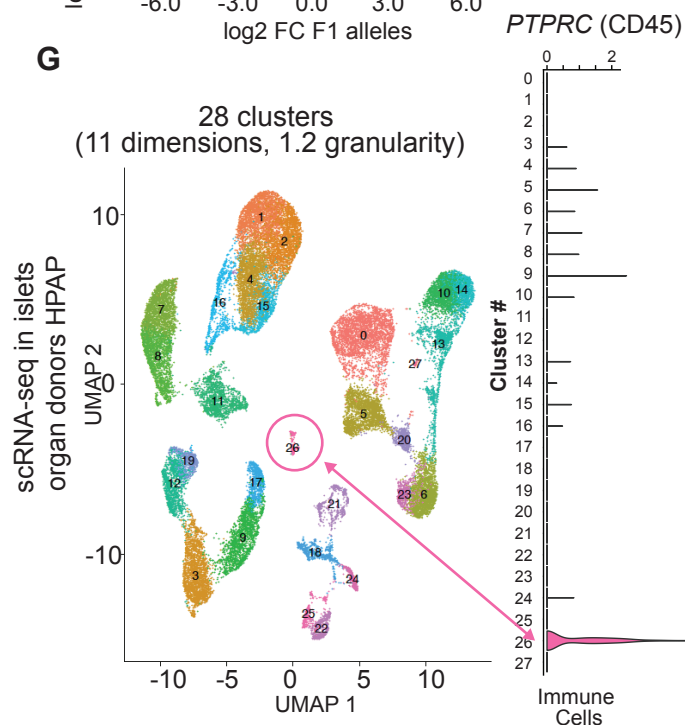

**Supplementary Figure 7. 3D chromatin misfolding at diabetes-associated loci in NOD mice is mediated in *cis* and is linked to human T1D (related to Figure 7).**

**(A, B)** Log<sub>2</sub> fold-change of contact frequencies in Smc1 HiChIP for the region harboring *Idd9.2* (A) and *Idd6.AM* (B) between each pair of strains NOD/F1 (left), F1/BL6 (middle) and NOD/BL6 offspring (middle).

**(C)** APA score of Smc1 HiChIP loop was used to quantify the strength in the strain-similar *Ets1* region between parental and F1 strains.

**(D-E)** Contact matrix for Smc1 HiChIP in F1 for allele-specific alignment at *Idd9.2* (D) and *Idd6.AM* loci (E). We used the allele-specific alignment of HiCPro (“ALLELE\_SPECIFIC\_SNP” providing NOD genome vcf file) and detected NOD-specific interactions at *Idd* regions.

**(F)** Ratio-ratio plot of Smc1 ChIP-seq parental log<sub>2</sub> fold change in double-positive thymocytes derived from C57BL/6 and NOD mice versus allele-specific log<sub>2</sub> fold change in double-positive thymocytes derived from (NOD x C57BL/6) F1 mice.

**(G)** Pancreatic islets were procured from the HPAP consortium under Human Islet Research Network (<https://hirnetwork.org/>) and single-cell RNA-seq was generated using 10xGenomics. The dimensionality reduction UMAP demonstrates the immune cell population in the islets of these donors that were used for the GSEA analysis.
